# Supplementary material
Source: PubMed Central journal article supplement (PMC7513256)
Supplement: bjsports-2020-102640supp001.pdf [file bjsports-2020-102640supp001.pdf]

**Supplementary material 1.** Screening to reduce health risks on return to football training after COVID-19 pandemic.

| Examination                        | Specification                                                                                                                                                                                                                                                                                                                                                                                                                                                                                                                                                                                                                                                                                                                                                                                                                                                                              |
|------------------------------------|--------------------------------------------------------------------------------------------------------------------------------------------------------------------------------------------------------------------------------------------------------------------------------------------------------------------------------------------------------------------------------------------------------------------------------------------------------------------------------------------------------------------------------------------------------------------------------------------------------------------------------------------------------------------------------------------------------------------------------------------------------------------------------------------------------------------------------------------------------------------------------------------|
| <b>Physical Examination</b>        | Basic physical examination following precompetition medical assessment; a record of body temperature should be included, and it is advisable to keep a daily record of players' body temperature; check for recent episodes of anosmia, ageusia and myalgia.                                                                                                                                                                                                                                                                                                                                                                                                                                                                                                                                                                                                                               |
| <b>Medical History</b>             | Completion of a short epidemiological questionnaire about possible relationships maintained in the previous weeks with potentially infected individuals; it is also recommended to include a psychosocial assessment to determine negative effect of confinement                                                                                                                                                                                                                                                                                                                                                                                                                                                                                                                                                                                                                           |
| <b>Blood and urine analysis</b>    | Complete blood testing to assess white cell count; CPK, LDH, aminotransferases, cardiac troponin in the case of myalgia; Vitamin D in players with reduced exposure to sunlight                                                                                                                                                                                                                                                                                                                                                                                                                                                                                                                                                                                                                                                                                                            |
| <b>Respiratory screening</b>       | Chest X-ray to rule out pulmonary infiltration; thoracic CT scan is recommended for those players tested positive for COVID-19 or with recent or present symptoms of the disease                                                                                                                                                                                                                                                                                                                                                                                                                                                                                                                                                                                                                                                                                                           |
| <b>Cardiovascular screening</b>    | Resting and stress electrocardiogram, echocardiogram, blood pressure                                                                                                                                                                                                                                                                                                                                                                                                                                                                                                                                                                                                                                                                                                                                                                                                                       |
| <b>Infection control screening</b> | If possible, PCR testing for all players; serology testing for those have previously tested positive but are recovered of the infection<br>In the event of a player testing positive for COVID-19 or who displays symptoms compatible with COVID-19, they must not resume training.                                                                                                                                                                                                                                                                                                                                                                                                                                                                                                                                                                                                        |
| <b>Clearance</b>                   | YES: Players with conclusive outcomes on all of these testing might be allowed to resume training routines; these include players tested negative for COVID-19 in pre-training assessment and those players with immuno-protection (if IgM negative and IgG positive) for COVID-19. Serology testing is recommended each 7-day intervals for these players, particularly before competition. PCR is recommended for those players reporting new symptoms related to COVID-19<br>NO: Players tested positive for COVID-19 (either symptomatic or asymptomatic), players negative for COVID-19 but with suspicious symptoms of the disease; players with IgM and IgG positive in the serology testing; all these players should be quarantined; PCR testing should be repeated 14 days after (for COVID-19 positives) and serology testing repeated 7 days after (for IgM and IgG positives) |
