# Supplementary material
Source: PubMed Central journal article supplement (PMC7513256)
Supplement: bjsports-2020-102640supp002.pdf [file bjsports-2020-102640supp002.pdf]

Supplementary material 2. Recommendations to foster football players' fitness levels by controlling health risks after COVID-19 pandemic.

|                 | Retraining phase                                                    | Performance phase                                                                                                                                     |
|-----------------|---------------------------------------------------------------------|-------------------------------------------------------------------------------------------------------------------------------------------------------|
| Main goal       | Reconditioning and injury prevention                                | Adaptation to football-specific movements and running actions                                                                                         |
| Organisation    | Individual exercises, in pairs or in small groups (up to 6 players) | Game specific workouts in small groups until the obtaining of brief simulated competitions with 11-players per side                                   |
| Length          | 5-7 days                                                            | 9-21 days                                                                                                                                             |
| Frequency       | 5-6 sessions/week                                                   | 5-6 sessions/week                                                                                                                                     |
| Density         | 1 session/day                                                       | 1 or 2 sessions/day, alternating demanding and recovery sessions                                                                                      |
| Duration        | 35-50 minutes/session                                               | 35-60 min/session                                                                                                                                     |
| Location        | Gymnasium and football pitch                                        | Mostly in football pitch                                                                                                                              |
| Load management | Progressive increase in the frequency, volume and intensity         | Increasing exercise intensity with intermittent activities<br>Longer duration of each repetition while gradually decreasing the number of repetitions |
| Recovery        | Complete or almost-complete recovery                                | Incorporate incomplete recovery during intermittent exercise in a progressive manner                                                                  |

|                      |                                                                                                                                                                                                                                                                                                                                                                                                                                                    |                                                                                                                                                                                                                                                                                                                                                                                                                                                 |
|----------------------|----------------------------------------------------------------------------------------------------------------------------------------------------------------------------------------------------------------------------------------------------------------------------------------------------------------------------------------------------------------------------------------------------------------------------------------------------|-------------------------------------------------------------------------------------------------------------------------------------------------------------------------------------------------------------------------------------------------------------------------------------------------------------------------------------------------------------------------------------------------------------------------------------------------|
| <b>Specific aims</b> | <p>Prioritisation of exercises without opposition-contact</p> <p>Progress in number of decision-making processes</p> <p>Alternate physical / motor skills</p> <p>Progress in design of specific agility exercises (reaction; changes of direction, etc) gradually increasing the distance of the movements</p> <p>Progress in the design of exercises with the ball, tending towards moderate number of contacts and low power kicking actions</p> | <p>Exercises in medium and large-sized groups, increasing playing spaces</p> <p>Incorporation of exercises with natural joint movements</p> <p>Increase speed of movements</p> <p>Increase distance of the running actions</p> <p>Inclusion of exercises with acceleration / deceleration</p> <p>Progress in exercises facing opposition</p> <p>In the design of ball exercises, tending towards the least number of contacts with the ball</p> |
| <b>Internal load</b> | <p>Measures of subjective perception of exertion (such as session rate of perceived exertion, <i>sRPE</i>) and muscle fatigue.</p> <p>Control of acute load</p>                                                                                                                                                                                                                                                                                    | <p>Measures of subjective perception of exertion (<i>sRPE</i>) and muscle fatigue</p> <p>Control of acute and chronic workloads</p>                                                                                                                                                                                                                                                                                                             |
| <b>Limitations</b>   | <p>Avoid tasks that require ample joint movements</p> <p>Avoid long distance sprint manoeuvres</p> <p>Avoid maximal acceleration/decelerations</p> <p>Avoid sizeable backlogs of work on consecutive days</p>                                                                                                                                                                                                                                      | <p>During the initial sessions, avoid running at maximum speed for more than 20 metres</p> <p>During the initial sessions, avoid kicking the ball with maximum intensity</p> <p>Avoid accumulation of physical load before the first competitive match</p>                                                                                                                                                                                      |
